# Supplementary material for: Innate activation of human primary epithelial cells broadens the host response to Mycobacterium tuberculosis in the airways
Source: PLoS Pathog. 2017 Sep 1;13(9):e1006577. doi: 10.1371/journal.ppat.1006577 (PMC5605092; doi:10.1371/journal.ppat.1006577)
Supplement: S1 Table — Significantly differentially expressed genes at a q-value < 5% were determined by Significance Analysis of Microarrays. (XLSX) [file ppat.1006577.s007.xlsx]

## Sheet: Table S1
Table S1: Differentially expressed genes in PBECs exposed to Mtb-infected THP-1 cells in transwell co-culture.
Significantly differentially expressed genes at a q-value < 5% were determined by Significance Analysis of Microarrays.
Gene Symbol	RefSeq	Fold change	q-value (in %)
CXCL10	NM_001565	12.804	0
IFI44L	NM_006820	11.316	0
RSAD2	NM_080657	10.509	0
IFI6	NM_002038	8.359	0
IFIT1	NM_001548	6.866	0
IFI44	NM_006417	6.259	0
IFIT3	NM_001031683	5.777	0
OAS2	NM_001032731	4.158	0
SAMD9L	NM_152703	3.504	0
CXCL11	NM_005409	3.346	0.4292
DDX58	NM_014314	3.334	0
IFIT2	NM_001547	3.322	0
DDX60	NM_017631	3.24	0
IFIH1	NM_022168	3.214	0
SAMHD1	NM_015474	2.927	0
DEFB4A	NM_004942	2.889	0
DDX60L	NM_001012967	2.792	0
MMP1	NM_001145938	2.681	0
SPRR2G	NM_001014291	2.641	0
DEFB4B	NM_001205266	2.625	0
IL36G	NM_019618	2.504	0
MX1	NM_001144925	2.483	0
IL8	NM_000584	2.462	0
OAS1	NM_001032409	2.444	0
DEFB103A	NM_001081551	2.4	1.9108
DEFB103A	NM_001081551	2.362	0.7968
HERC5	NM_016323	2.359	0.4202
IFI27	NM_001130080	2.322	0
HERC6	NM_001165136	2.307	0
CCL20	NM_001130046	2.264	0
MMP10	NM_002425	2.142	0
EPSTI1	NM_001002264	2.133	0
PARP14	NM_017554	2.116	0
USP18	NM_017414	2.006	0
PRSS22	NM_022119	1.996	0
PARP9	NM_001146102	1.99	0
HEPHL1	NM_001098672	1.948	0
SPRR2F	NM_001014450	1.946	0
MIR147B	NR_030599	1.941	0
SAMD9	NM_001193307	1.937	0
PLSCR1	NM_021105	1.923	0
S100A7A	NM_176823	1.913	0
MX2	NM_002463	1.88	0
STAT1	NM_007315	1.856	0
XAF1	NM_017523	1.831	0
LCE3E	NM_178435	1.821	0
OAS3	NM_006187	1.808	0
LCE3D	NM_032563	1.803	0
EIF2AK2	NM_001135651	1.786	0
S100A12	NM_005621	1.782	0
OASL	NM_003733	1.758	0
S100A7	NM_002963	1.734	0
STC1	NM_003155	1.716	0
SLC6A14	NM_007231	1.711	0
PARP12	NM_022750	1.668	0
PNPT1	NM_033109	1.62	0.5155
CXCL1	NM_001511	1.608	0
IL1RL1	NM_003856	1.607	0.5587
TRANK1	NM_014831	1.565	0.4292
SOD2	NM_000636	1.556	0
ENKUR	NM_145010	1.546	0
VNN1	NM_004666	1.544	0
TDRD7	NM_014290	1.543	0
USP41	ENST00000454608	1.543	0
SERPINB4	NM_002974	1.539	0.4808
SPRR2C	NR_003062	1.536	0
DTX3L	NM_138287	1.533	0
LAMP3	NM_014398	1.529	0.5
IL36RN	NM_012275	1.521	0
CSF2	NM_000758	1.502	0
TAP1	NM_000593	1.498	0
TAP1	NM_000593	1.497	0
TAP1	NM_000593	1.497	0
TAP1	NM_000593	1.492	0
TAP1	NM_000593	1.492	0
TAP1	NM_000593	1.492	0
TAP1	NM_000593	1.492	0
TAP1	NM_000593	1.492	0
DHRS9	NM_005771	1.485	0
MMP13	NM_002427	1.472	0.8299
IFIT5	NM_012420	1.472	0.5155
TRIM25	NM_005082	1.471	0
SP110	NM_001185015	1.469	1.1407
IL1R2	NM_004633	1.467	0
CMPK2	NM_207315	1.466	0
MMP9	NM_004994	1.463	0
OR56B1	NM_001005180	1.461	1.1407
BST2	NM_004335	1.46	0.4405
CNFN	NM_032488	1.456	0.4255
SPRR2E	NM_001024209	1.455	0
WFDC12	NM_080869	1.455	0
IL6	NM_000600	1.45	0.5747
RNASE7	NM_032572	1.445	0
GBP5	NM_001134486	1.442	0
APOBEC3A	NM_145699	1.438	0
IL36B	NM_014438	1.438	0
HBEGF	NM_001945	1.43	0
SPRR2D	NM_006945	1.429	0
ICAM1	NM_000201	1.427	0
SPRR2B	NM_001017418	1.417	0
IL36A	BC107043	1.416	0
NT5C3	NM_001002010	1.411	2.4242
TRIM21	NM_003141	1.407	0
CRCT1	NM_019060	1.407	1.1407
HSD17B2	NM_002153	1.406	0
SLC28A3	NM_001199633	1.404	0
ADAM28	NM_014265	1.402	0
KLK6	NM_001012964	1.402	0.5
TNFAIP3	NM_006290	1.397	0
SNORD114-21	NR_003214	1.393	1.3333
GBP4	NM_052941	1.388	1.3333
NFKBIA	NM_020529	1.379	0
SAA2	NM_001127380	1.379	0
TMPRSS11F	NM_207407	1.379	0.495
IL23A	NM_016584	1.37	0.8333
XDH	NM_000379	1.367	0
MLKL	NM_001142497	1.363	0
PLAUR	NM_001005376	1.36	0
MUC21	NM_001010909	1.359	0.4673
CXCL2	NM_002089	1.357	0
INHBA	NM_002192	1.357	0
PLAT	NM_000930	1.356	0
TMEM171	NM_001161342	1.351	0
GBP1	NM_002053	1.351	1.3333
KYNU	NM_001032998	1.346	0
HSD11B1	NM_001206741	1.345	0.5587
IRAK2	NM_001570	1.344	0
SNORD113-6	NR_003234	1.343	4.6948
IFI35	NM_005533	1.343	0.4484
FERMT1	NM_017671	1.343	0
SPRR2A	NM_005988	1.339	0.5525
IFIT1B	NM_001010987	1.338	0
CEACAM1	NM_001712	1.337	0
SERPINB3	NM_006919	1.334	1.6077
MUC21	NM_001010909	1.332	1.1407
MUC21	NM_001010909	1.329	0.4808
MUC21	NM_001010909	1.329	0.4808
IL1B	NM_000576	1.329	0
MUC21	NM_001010909	1.328	0.4484
PDZK1IP1	NM_005764	1.327	0
WFDC5	NM_145652	1.326	1.4085
MUC21	NM_001010909	1.326	0.4202
NFKBIZ	NM_001005474	1.324	0
SAA1	NM_000331	1.324	0
PI3	NM_002638	1.318	0.4484
SP100	NM_001080391	1.317	4.5024
SLFN5	NM_144975	1.315	0
PAPL	NM_001004318	1.312	1.0676
IL1RN	NM_173843	1.31	0
CFB	NM_001710	1.309	0
CFB	NM_001710	1.309	0
CFB	NM_001710	1.309	0
CFB	NM_001710	1.309	0
IL1A	NM_000575	1.309	0
CFB	NM_001710	1.308	0
CFB	NM_001710	1.306	0
SEMA7A	NM_001146029	1.305	0
SERPINB1	NM_030666	1.305	0
TMPRSS11GP	NR_033737	1.304	0.8163
HCAR3	NM_006018	1.301	0
G0S2	NM_015714	1.3	0
RTP4	NM_022147	1.299	0
NMI	NM_004688	1.299	1.8519
GPR110	NM_025048	1.297	1.1407
NAV3	NM_014903	1.296	0
PLA2G4E	NM_001206670	1.295	0
TMPRSS11D	NM_004262	1.294	0.5155
IL24	NM_001185156	1.293	0
UBE2L6	NM_004223	1.291	1.3333
MAOA	NM_000240	1.291	0
SLC5A1	NM_000343	1.29	0
CDSN	NM_001264	1.289	3.5519
ABCA12	NM_173076	1.289	2.6866
STEAP4	NM_001205315	1.287	4.1026
VEGFC	NM_005429	1.286	0.4673
LAP3	NM_015907	1.286	2.6866
CFB	NM_001710	1.284	0
PPIF	NM_005729	1.282	0
CDSN	NM_001264	1.282	3.9164
APOL6	NM_030641	1.277	0.5155
PRDM1	NM_001198	1.277	0
MUC21	NM_001010909	1.275	0.4405
ZC3H12C	NM_033390	1.274	0.4808
PGLYRP4	NM_020393	1.271	0
SNORD114-4	NR_003196	1.27	0
PHF11	NM_001040444	1.269	0.8032
ANTXR2	NM_001145794	1.265	0
IFITM1	NM_003641	1.262	0.4405
SERPINA3	NM_001085	1.261	1.0714
LCE3A	NM_178431	1.26	4.3147
ZC3HAV1	NM_024625	1.26	1.0714
LCN2	NM_005564	1.259	0
SGPP2	NM_152386	1.257	0
STAT2	NM_005419	1.257	2.6471
GSDMA	NM_178171	1.256	0.8163
IFI16	NM_001206567	1.255	3.2303
TGM2	NM_004613	1.255	0
LYN	NM_001111097	1.252	0.4673
PML	NM_002675	1.247	0.5
LOC100506377	ENST00000473756	1.247	1.8519
RHCG	NM_016321	1.246	2.6627
HCAR2	NM_177551	1.245	0
S100A9	NM_002965	1.244	0.4484
CDSN	NM_001264	1.244	4.4554
RNF19B	NM_001127361	1.244	0
RND1	NM_014470	1.243	1.3333
GCH1	NM_000161	1.241	0
IL7R	NM_002185	1.238	0.5495
MIR513A1	ENST00000385138	1.238	3.7333
ZC3H12A	NM_025079	1.237	0
VNN3	NR_028290	1.237	0
TMEM140	NM_018295	1.236	0.5525
TNIP1	NM_001252385	1.234	0
S100A8	NM_002964	1.232	0.5155
ALAS1	NM_000688	1.231	0
RASGEF1B	NM_152545	1.23	1.8868
NFE2L3	NM_004289	1.228	1.6447
TMPRSS11E	NM_014058	1.228	3.5519
TRIM14	NM_033220	1.228	1.0909
IFNGR1	NM_000416	1.225	1.8519
TMPRSS11E	NM_014058	1.224	3.9164
SDR16C5	NM_138969	1.224	0
CTSS	NM_004079	1.219	1.8868
HLA-B	NM_005514	1.219	0
ALOX12B	NM_001139	1.218	3.352
TGM1	NM_000359	1.217	1.8519
ZNFX1	NM_021035	1.217	0.4651
HLA-B	NM_005514	1.217	0
SLC26A9	NM_052934	1.217	0
ANKRD22	NM_144590	1.216	3.2303
TGFA	NM_003236	1.216	0
PTAFR	NM_001164721	1.215	0
ISG15	NM_005101	1.214	2.9155
LOC152225	NR_026934	1.214	3.2303
CD68	NM_001040059	1.213	1.4085
HLA-B	NM_005514	1.212	0
PMAIP1	NM_021127	1.211	3.3241
MMP12	NM_002426	1.211	3.9164
TLR2	NM_003264	1.21	0.5587
APOBEC3B	NM_004900	1.209	1.1278
PLAU	NM_001145031	1.208	0
PRIC285	NM_001037335	1.206	0.5155
ZPLD1	NM_175056	1.206	1.6234
HLA-B	NM_005514	1.205	0.5128
SERPINB9	NM_004155	1.205	2.1341
DAPP1	NM_014395	1.205	1.3333
ALDH1A3	NM_000693	1.204	0
HLA-B	NM_005514	1.204	0.5747
POLB	NM_002690	1.204	4.5024
ATP1B1	NM_001677	1.202	0
MYH16	NR_002147	1.202	0
HLA-B	NM_005514	1.202	0.5587
JHDM1D	NM_030647	1.202	4.6948
EDN1	NM_001168319	1.201	0.4202
TTC9	NM_015351	1.2	0.4329
LOC100134229	NR_024451	1.2	4.4554
REP15	NM_001029874	1.2	4.6948
GJB4	NM_153212	1.197	1.8987
LCE3C	ENST00000333881	1.195	2.9155
MMP3	NM_002422	1.194	0.4329
SLC9A7	NM_032591	1.194	1.1364
C1orf74	NM_152485	1.193	0.7874
EHD4	NM_139265	1.193	0.7782
LY6E	NM_001127213	1.193	1.0714
TMEM62	NM_024956	1.193	4.5024
BCL2A1	NM_001114735	1.188	0.8097
CLDN7	NM_001185022	1.187	0
ARNTL2	NM_001248002	1.186	0.495
MIR3660	NR_037433	1.185	0
BMP2	NM_001200	1.184	1.083
CD274	NM_014143	1.183	4.6948
ITGA2	NM_002203	1.183	0.5587
EMP1	NM_001423	1.182	1.3201
SGK1	NM_001143676	1.182	0
SPRR4	NM_173080	1.181	1.6234
TMC5	NM_001105248	1.181	1.3333
ADAM19	NM_033274	1.181	1.9108
SCARNA23	NR_003007	1.18	0
SNORD114-9	NR_003201	1.179	0
RN5S173	ENST00000364857	1.176	1.3841
OR6M1	NM_001005325	1.176	2.6866
RNU7-15P	ENST00000516343	1.176	4.3689
LOC541472	ENST00000325042	1.175	3.7333
DSCAM	NM_001389	1.172	0.5405
SQRDL	NM_021199	1.171	0.5814
C3	NM_000064	1.171	0.5
SLC44A4	NM_001178044	1.171	0
ADAM8	NM_001109	1.171	0.7843
IFNA2	NM_000605	1.169	4.2821
SLC44A4	NM_001178044	1.169	0
SLC44A4	NM_001178044	1.169	0
SNORD115-2	NR_003294	1.169	3.3241
IDH3A	NM_005530	1.169	3.7333
RN5S517	ENST00000364724	1.169	0.4926
RNU7-54P	ENST00000459236	1.168	1.3333
KPNA7	NM_001145715	1.166	0.4484
GLRX	NM_001118890	1.165	0
SERPINB10	BC096218	1.165	0.4484
CASP4	NM_001225	1.164	3.3058
SLC44A4	NM_001178044	1.164	0.5155
RIPK3	NM_006871	1.163	3.7333
PNP	NM_000270	1.163	0.4673
SNX9	NM_016224	1.162	1.083
SLC46A3	NM_001135919	1.161	4.4554
MYD88	NM_001172566	1.16	0.4785
SLC44A4	NM_001178044	1.16	0.5
SLC44A4	NM_001178044	1.16	0.5405
SLC44A4	NM_001178044	1.16	0.5405
N4BP1	NM_153029	1.159	4.5024
ELK3	NM_005230	1.157	1.1111
KIAA0754	NM_015038	1.157	2.8902
OSMR	NM_003999	1.156	0.7968
EFNA1	NM_004428	1.156	0.4405
MXD1	NM_001202513	1.156	3.7333
RN5S195	ENST00000362675	1.156	0
YOD1	NM_018566	1.155	2.1341
CDCP1	NM_022842	1.153	0.8097
CXCL16	NM_022059	1.153	0
TM4SF1	NM_014220	1.151	0
CARHSP1	NM_014316	1.15	0.5155
SAT1	NM_002970	1.15	1.3841
SAA4	NM_006512	1.149	0
PHLDA1	NM_007350	1.149	0.4808
BPGM	NM_001724	1.149	2.8902
PTPN12	NM_001131008	1.148	1.634
IRF7	NM_004031	1.147	3.7333
NPC1	NM_000271	1.147	4.3147
IRF1	NM_002198	1.147	1.6026
CAB39	NM_001130849	1.146	2.9155
PDZD2	NM_178140	1.146	2.6627
SLC11A2	NM_001174125	1.146	0.8163
RPS6KA5	NM_004755	1.145	4.5024
TINF2	NM_001099274	1.144	1.3333
ST3GAL1	NM_003033	1.144	0
HS3ST1	NM_005114	1.143	0.7782
LCMT1	NM_001032391	1.143	1.1152
SOX9	NM_000346	1.142	3.3058
FEZ1	NM_005103	1.141	0.8163
SLC18B1	NM_052831	1.139	3.9164
GK	NM_000167	1.139	4.3147
SH3KBP1	NM_001024666	1.139	0.7937
BIRC3	NM_001165	1.138	4.4554
FUT8	NM_178155	1.138	0.8032
IRF2	NM_002199	1.136	1.8519
BCL3	NM_005178	1.136	2.1472
HLA-C	NM_001243042	1.135	1.3201
MYO1E	NM_004998	1.135	3.9164
NFKB2	NM_001077493	1.133	0.4329
CYP27B1	NM_000785	1.133	0
NT5E	NM_001204813	1.133	3.7333
TRIB1	NM_025195	1.133	1.4085
ITPKC	NM_025194	1.131	0.4484
FUT2	NM_000511	1.131	1.6077
BID	NM_001196	1.131	0
HLA-C	NM_001243042	1.129	2.6866
TAP2	NM_000544	1.129	3.125
TAP2	NM_000544	1.129	3.125
TAP2	NM_000544	1.129	3.125
IFNGR2	NM_005534	1.128	0.4386
HLA-C	NM_001243042	1.127	3.3241
CASP10	NM_032976	1.127	1.3793
PTPRK	NM_002844	1.127	4.3689
C19orf66	NM_018381	1.127	2.6627
SLC43A3	NM_014096	1.126	1.634
HLA-C	NM_001243042	1.126	2.6471
SCG5	NM_001144757	1.125	0.4255
C5orf4	NM_032385	1.125	3.7234
SDCBP2	NM_001199784	1.124	0
TNFRSF10A	NM_003844	1.121	1.6181
ANO1	NM_018043	1.121	4.5024
UGCG	NM_003358	1.121	3.352
SDC4	NM_002999	1.121	1.1152
MIR3145	NR_036099	1.12	1.3746
RAB31	NM_006868	1.12	4.2821
PLOD2	NM_000935	1.12	4.918
TAP2	NM_000544	1.12	3.8961
CYB5R2	NM_016229	1.119	2.6866
QPCT	NM_012413	1.119	0.4673
TAP2	NM_000544	1.118	4.3689
TAP2	NM_000544	1.118	4.5024
DAB2	NM_001244871	1.118	3.9164
RASSF10	NM_001080521	1.117	1.3201
TAP2	NM_000544	1.117	3.7333
HLA-C	NM_001243042	1.117	4.3147
ITGA5	NM_002205	1.117	4.4554
PPP2R2C	NM_181876	1.116	4.2821
AKAP12	NM_005100	1.116	3.5519
TAP2	NM_000544	1.116	3.9164
RNU7-32P	ENST00000516281	1.116	4.1026
GRK5	NM_005308	1.115	4.3689
NEDD4L	NM_001144968	1.114	3.2303
WWC1	NM_001161661	1.112	2.4316
RAC2	NM_002872	1.11	1.8519
HLA-A	BC003069	1.11	0.4484
DCUN1D3	NM_173475	1.11	0.5155
EPHA2	NM_004431	1.109	3.1609
HLA-C	NM_001243042	1.109	4.3689
JUNB	BC009465	1.107	4.5024
AMPD3	NM_001172431	1.107	4.1026
UNC93B1	NM_030930	1.106	4.5024
TTTY4	NR_001525	1.106	4.3689
TTTY4C	ENST00000456123	1.106	4.3689
TTTY4C	ENST00000436568	1.106	4.3689
BTG1	NM_001731	1.103	2.8902
HLA-E	NM_005516	1.103	1.0909
HLA-E	NM_005516	1.103	1.0909
HLA-E	NM_005516	1.103	1.0909
HLA-E	NM_005516	1.103	1.0909
HLA-E	NM_005516	1.102	1.3841
HLA-E	NM_005516	1.102	1.3841
HLA-E	NM_005516	1.102	1.3841
VPS37B	NM_024667	1.102	2.1472
KCNK1	NM_002245	1.101	0.7874
EMR2	NM_013447	1.1	1.1278
ARHGAP31	NM_020754	1.1	3.7333
KIAA0247	NM_014734	1.1	4.5024
HLA-G	NM_002127	1.1	4.1026
UPP1	NM_003364	1.099	1.8987
NIPAL4	NM_001099287	1.099	0.7752
PLEK2	NM_016445	1.099	4.4554
DNAJB6	NM_058246	1.095	4.1026
SLC25A28	NM_031212	1.095	3.1609
LAMC2	NM_005562	1.094	1.1152
UBTD2	NM_152277	1.089	4.9065
IRF9	NM_006084	1.089	0.8333
TMEM173	NM_198282	1.088	3.8961
ACE2	NM_021804	1.087	3.1519
NAGK	NM_017567	1.074	4.4554
